# Supplementary material
Source: PubMed Central journal article supplement (PMC7902480)

### Supplementary Figure 1.

Butterfly plots showing proportional hazards regression modeling of progression to late age-related macular degeneration outcomes, performed separately according to the AREDS 9-step severity scale grade at baseline. For each nutrient, the hazard ratio of dietary intake quintile 5 (with quintile 1 as reference) is shown on the x axis, with protective associations in blue and harmful associations in red; smaller P values are denoted by darker colors.

A1. Late AMD. Baseline AMD severity: 1-6

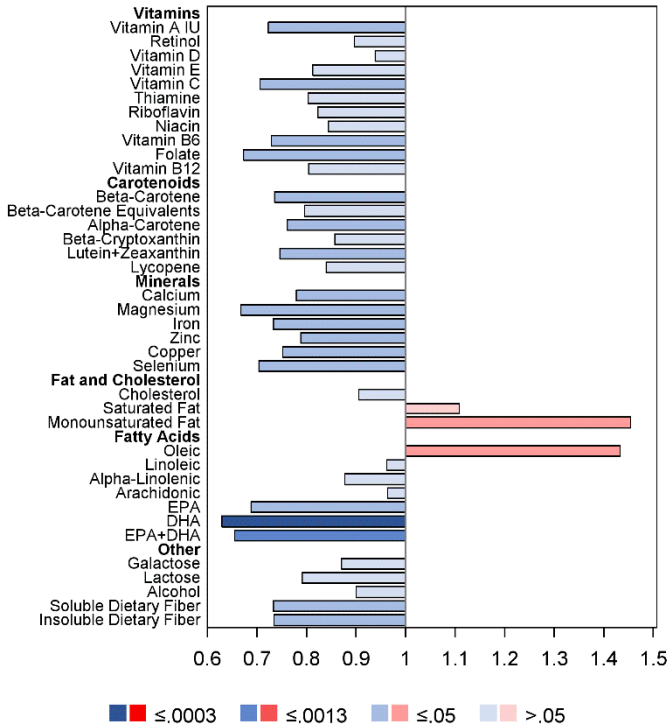

A2. Late AMD. Baseline AMD severity: 7-8

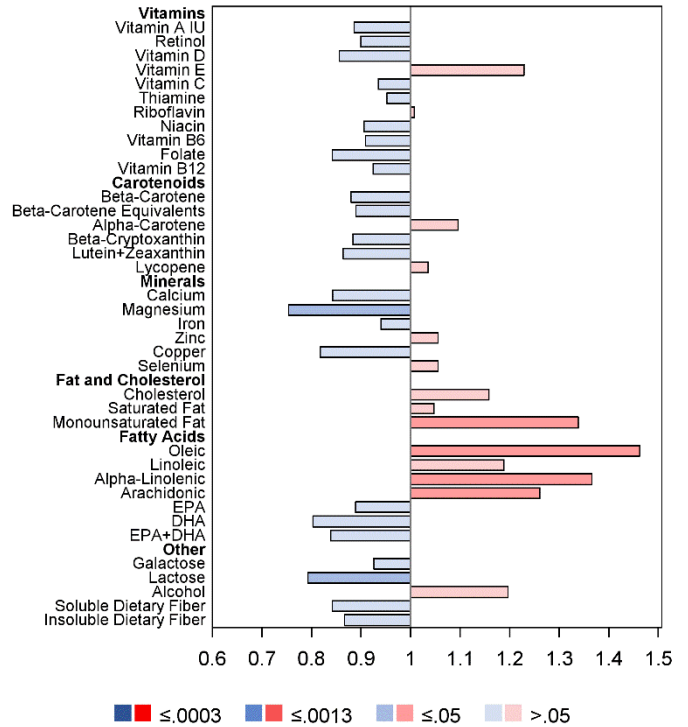

B1. Geographic Atrophy. Baseline AMD severity: 1-6

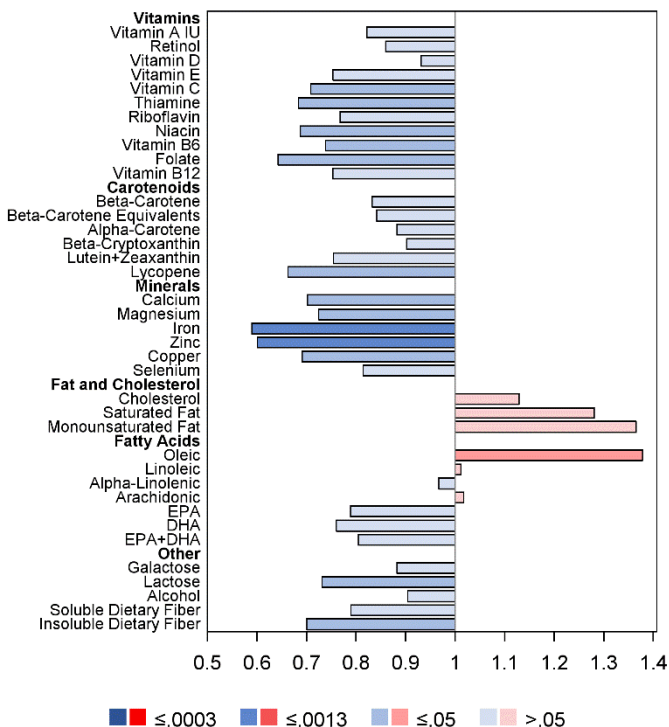

B2. Geographic Atrophy. Baseline AMD severity: 7-8

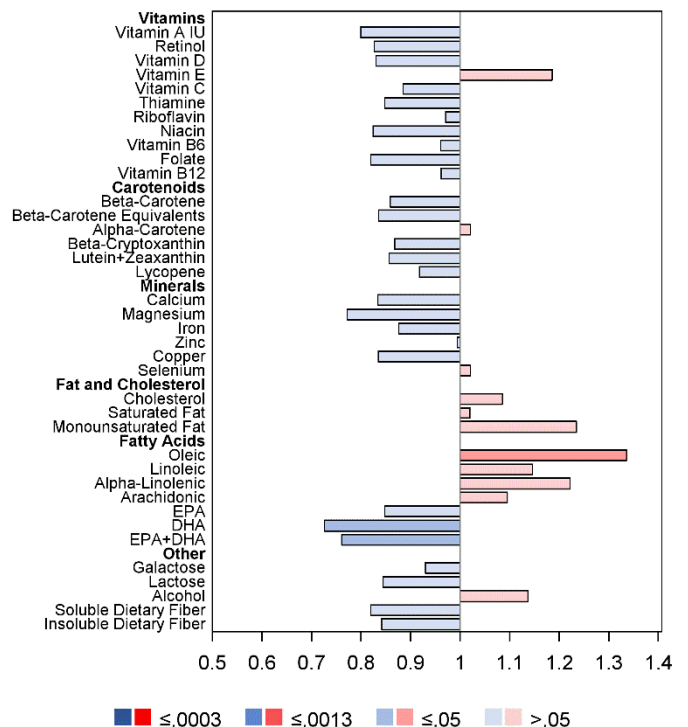

C1. Neovascular AMD. Baseline AMD severity: 1-6

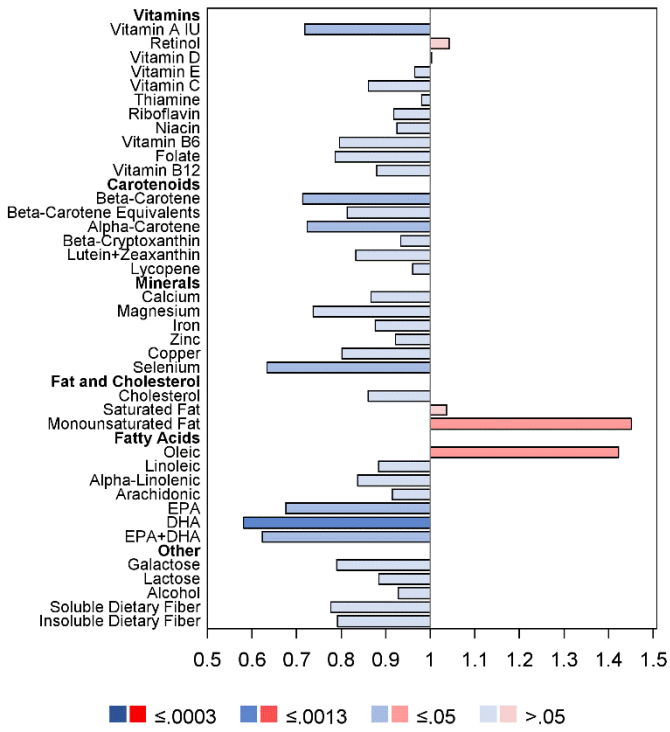

C2. Neovascular AMD. Baseline AMD severity: 7-8

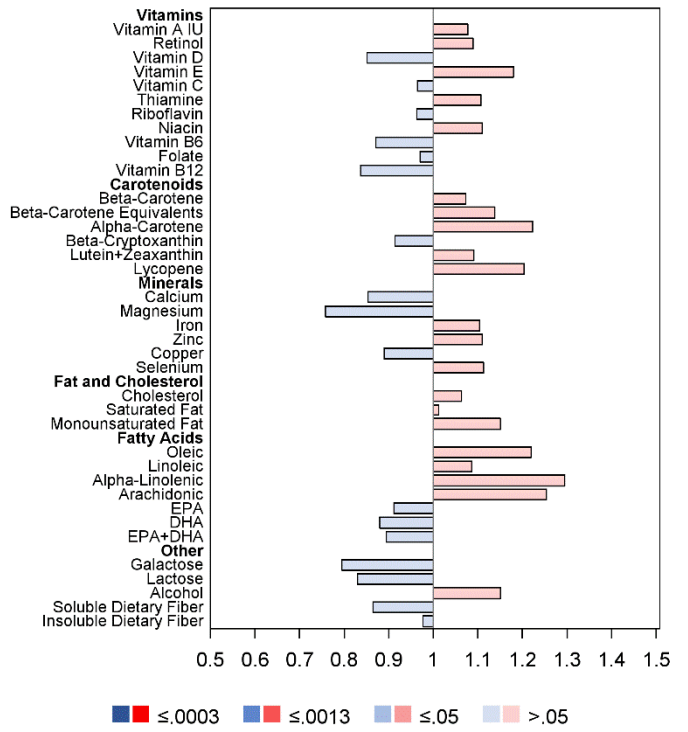

Supplement: NIHMS1624410-supplement-2.pdf [file NIHMS1624410-supplement-2.pdf]
