# Supplementary material
Source: PubMed Central journal article supplement (PMC7902480)
Supplement: NIHMS1624410-supplement-3.pdf [file NIHMS1624410-supplement-3.pdf]

Supplementary Table 1. Daily estimates of nutrient intake from foods in participants of the combined AREDS/AREDS2 cohort (n=8130), AREDS cohort (n=4504), and AREDS2 cohort (n=3738)

|                                          | Combined cohort<br>(AREDS and AREDS2) |         | AREDS cohort     |         | AREDS2 cohort    |         |
|------------------------------------------|---------------------------------------|---------|------------------|---------|------------------|---------|
|                                          | Mean (SD)                             | Median  | Mean (SD)        | Median  | Mean (SD)        | Median  |
| Calories, kcal                           | 1609.9 (642.3)                        | 1524.1  | 1521.0 (645.2)   | 1426.0  | 1714.4 (622.5)   | 1632.1  |
| Vitamin A, IU                            | 7967.0 (4949.0)                       | 6763.5  | 7087.3 (4140.3)  | 6224.6  | 8982.8 (5567.0)  | 7611.2  |
| Vitamin A, RAE                           |                                       |         |                  |         | 836.0 (479.4)    | 747.6   |
| Retinol, mcg                             | 539.9 (420.4)                         | 447.6   | 614.9 (438.0)    | 527.0   | 450.2 (376.3)    | 377.9   |
| Vitamin D, mcg                           | 5.4 (3.7)                             | 4.5     | 5.7 (3.7)        | 5.0     | 4.9 (3.6)        | 4.0     |
| Vitamin E, mg                            | 8.9 (5.4)                             | 7.6     | 10.2 (6.1)       | 8.9     | 7.4 (4.0)        | 6.6     |
| Vitamin C, mg                            | 108.8 (60.1)                          | 100.9   | 107.6 (58.0)     | 100.2   | 110.0 (62.5)     | 102.0   |
| Thiamine, mg                             | 1.4 (0.6)                             | 1.3     | 1.3 (0.6)        | 1.3     | 1.4 (0.6)        | 1.3     |
| Riboflavin, mg                           | 1.8 (0.8)                             | 1.7     | 1.7 (0.8)        | 1.5     | 2.0 (0.8)        | 1.9     |
| Niacin, mg                               | 19.1 (8.3)                            | 17.9    | 17.0 (7.5)       | 15.8    | 21.6 (8.4)       | 20.4    |
| Vitamin B6, mg                           | 1.8 (0.8)                             | 1.6     | 1.6 (0.7)        | 1.5     | 2.0 (0.8)        | 1.8     |
| Folate, mcg                              | 383.6 (171.9)                         | 357.2   | 361.6 (163.8)    | 336.3   | 409.2 (177.2)    | 381.8   |
| Natural food folate, mcg                 |                                       |         |                  |         | 273.2 (117.6)    | 255.5   |
| Folic acid, mcg                          |                                       |         |                  |         | 376.1 (276.5)    | 426.0   |
| Vitamin B12, mcg                         | 5.5 (3.9)                             | 4.7     | 4.7 (3.2)        | 4.0     | 6.4 (4.3)        | 5.6     |
| Beta-carotene, mcg                       | 3322.7 (2512.8)                       | 2651.4  | 2681.3 (1900.6)  | 2212.4  | 4069.9 (2900.0)  | 3291.2  |
| Beta-carotene equivalents, mcg           |                                       |         | 3021.5 (2132.3)  | 2502.3  |                  |         |
| Alpha-carotene, mcg *                    | 614.5 (603.1)                         | 440.2   | 533.3 (515.0)    | 388.5   | 708.2 (678.1)    | 500.0   |
| Beta-cryptoxanthin, mcg *                | 143.4 (104.2)                         | 124.8   | 147.0 (94.7)     | 132.2   | 138.8 (114.0)    | 111.3   |
| Lutein and zeaxanthin, mcg *             | 2495.4 (2336.3)                       | 1829.7  | 1726.7 (1181.5)  | 1431.1  | 3397.4 (2953.0)  | 2554.2  |
| Lycopene, mcg *                          | 5121.0 (3904.8)                       | 4259.2  | 4643.0 (3293.4)  | 3975.5  | 5667.7 (4439.5)  | 4569.3  |
| Calcium, mg                              | 747.3 (407.7)                         | 664.2   | 778.7 (453.6)    | 691.8   | 709.6 (339.5)    | 636.7   |
| Magnesium, mg                            | 273.8 (107.9)                         | 260.7   | 250.0 (98.0)     | 238.1   | 301.9 (111.9)    | 287.6   |
| Iron, mg                                 | 12.5 (6.0)                            | 11.4    | 11.7 (5.9)       | 10.6    | 13.4 (5.9)       | 12.4    |
| Zinc, mg                                 | 10.5 (5.2)                            | 9.6     | 10.2 (5.6)       | 9.1     | 10.8 (4.6)       | 10.0    |
| Copper, mg                               | 1.2 (0.6)                             | 1.1     | 0.9 (0.4)        | 0.9     | 1.4 (0.7)        | 1.3     |
| Selenium, mcg *                          |                                       |         | 81.8 (35.8)      | 76.6    | 16.4 (38.1)      | 0.0     |
| Saturated fat, % kcal *                  | 11.1 (3.2)                            | 10.9    | 11.4 (3.6)       | 11.2    | 10.7 (2.6)       | 10.6    |
| Monounsaturated fat, % kcal *            | 13.1 (3.5)                            | 13.0    | 12.8 (3.4)       | 12.9    | 13.4 (3.5)       | 13.1    |
| Cholesterol, mg *                        | 201.6 (114.7)                         | 182.8   | 169.3 (107.9)    | 146.9   | 239.4 (110.8)    | 225.4   |
| Oleic acid, mg per 1000 kcal *           | 13566.9 (3718.7)                      | 13407.3 | 13410.7 (3687.4) | 13486.8 | 13747.8 (3744.3) | 13353.3 |
| Linoleic acid, mg per 1000 kcal *        | 7438.0 (2626.8)                       | 7053.3  | 8364.7 (2720.1)  | 8129.3  | 6355.0 (2032.9)  | 6041.5  |
| Alpha-linolenic acid, mg per 1000 kcal * | 751.4 (297.7)                         | 699.2   | 802.9 (282.8)    | 761.1   | 690.7 (302.5)    | 638.0   |
| EPA, mg per 1000 kcal *                  | 46.0 (80.7)                           | 23.8    | 22.9 (22.2)      | 17.3    | 73.1 (110.5)     | 39.0    |
| DPA, mg per 1000 kcal *                  |                                       |         |                  |         | 15.7 (14.3)      | 12.3    |
| DHA, mg per 1000 kcal *                  | 67.5 (80.6)                           | 43.2    | 35.7 (26.7)      | 29.5    | 104.9 (103.4)    | 76.3    |
| EPA+DHA, mg per 1000 kcal *              |                                       |         |                  |         | 178.2 (209.7)    | 115.1   |
| EPA+DPA+DHA, mg per 1000 kcal *          |                                       |         |                  |         | 144.6 (127.4)    | 113.0   |
| Arachidonic acid, mg per 1000 kcal *     | 61.8 (32.4)                           | 56.1    | 48.5 (23.6)      | 45.4    | 77.5 (34.3)      | 72.7    |
| Galactose, gm                            |                                       |         | 0.3 (0.5)        | 0.1     |                  |         |
| Lactose, gm                              | 16.0 (13.5)                           | 12.9    | 18.4 (14.6)      | 14.9    | 13.2 (11.2)      | 10.2    |
| Alcohol, gm                              | 7.1 (13.5)                            | 1.3     | 6.4 (13.8)       | 0.9     | 8.0 (12.9)       | 2.0     |
| Fiber, gm                                |                                       |         |                  |         | 19.0 (8.5)       | 17.6    |
| Soluble dietary fiber, gm                |                                       |         | 5.5 (2.3)        | 5.2     |                  |         |
| Insoluble dietary fiber, gm              |                                       |         | 9.8 (4.3)        | 9.2     |                  |         |
| Total choline, gm                        |                                       |         |                  |         | 312.1 (113.2)    | 299.2   |
| Free choline, gm                         |                                       |         |                  |         | 69.3 (25.9)      | 65.9    |
| Glycemic index                           |                                       |         |                  |         | 51.9 (3.9)       | 52.1    |
| Glycemic load                            |                                       |         |                  |         | 105.9 (44.7)     | 99.8    |

Abbreviations: AREDS=Age-Related Eye Disease Study; DHA=docosahexaenoic acid; DPA=docosapentaenoic acid; EPA=eicosapentaenoic acid; IU=international units; RAE=retinol activity equivalents; SD=standard deviation

\* values shown for AREDS2 (but not AREDS) include any additional intake from oral supplements
