# Supplementary material
Source: PubMed Central journal article supplement (PMC7902480)
Supplement: NIHMS1624410-supplement-4.pdf [file NIHMS1624410-supplement-4.pdf]

Supplementary Table 2. Daily estimates of nutrient intake from foods: median values for each quintile

A. Combined cohort (AREDS and AREDS2; n=8130 participants)

| Nutrient                 | Female   |          |          |          |          | Male     |          |          |          |          |
|--------------------------|----------|----------|----------|----------|----------|----------|----------|----------|----------|----------|
|                          | Q1       | Q2       | Q3       | Q4       | Q5       | Q1       | Q2       | Q3       | Q4       | Q5       |
| Vitamin A, IU            | 3837.40  | 5338.92  | 6764.32  | 8391.09  | 12677.53 | 4053.08  | 5739.58  | 6791.70  | 8766.17  | 12411.37 |
| Retinol, mcg             | 193.03   | 334.07   | 430.44   | 548.61   | 828.46   | 226.98   | 393.86   | 511.64   | 635.02   | 978.54   |
| Vitamin D, mcg           | 1.85     | 3.24     | 4.37     | 5.65     | 8.65     | 2.25     | 4.04     | 5.14     | 6.26     | 9.55     |
| Vitamin E, mg            | 4.71     | 6.24     | 7.05     | 8.76     | 12.17    | 5.31     | 6.92     | 8.33     | 10.75    | 15.54    |
| Vitamin C, mg            | 43.72    | 78.54    | 106.63   | 126.66   | 156.76   | 45.27    | 79.32    | 104.57   | 131.46   | 165.81   |
| Thiamine, mg             | 0.93     | 1.18     | 1.21     | 1.24     | 1.40     | 1.13     | 1.43     | 1.47     | 1.53     | 1.83     |
| Riboflavin, mg           | 1.05     | 1.41     | 1.58     | 1.81     | 2.16     | 1.40     | 1.73     | 1.85     | 2.07     | 2.48     |
| Niacin, mg               | 12.32    | 14.88    | 16.31    | 17.79    | 20.83    | 15.66    | 19.29    | 20.22    | 21.14    | 25.50    |
| Vitamin B6, mg           | 1.09     | 1.38     | 1.55     | 1.68     | 2.00     | 1.39     | 1.66     | 1.84     | 2.02     | 2.42     |
| Folate, mcg              | 236.56   | 300.13   | 332.73   | 368.81   | 434.29   | 284.98   | 365.60   | 403.93   | 440.22   | 538.61   |
| Vitamin B12, mcg         | 2.20     | 3.29     | 4.32     | 5.48     | 7.59     | 2.93     | 4.39     | 5.47     | 6.45     | 9.30     |
| Beta-Carotene, mcg       | 1175.95  | 1975.00  | 2734.46  | 3763.38  | 6083.62  | 1241.44  | 2002.72  | 2583.45  | 3513.29  | 5783.69  |
| Alpha-Carotene, mcg      | 137.44   | 284.48   | 420.15   | 666.43   | 1286.92  | 151.52   | 324.17   | 466.47   | 669.33   | 1239.88  |
| Beta-Cryptoxanthin, mcg  | 38.27    | 80.25    | 132.59   | 184.36   | 231.27   | 38.41    | 83.84    | 134.62   | 183.78   | 249.54   |
| Lutein+Zeaxanthin, mcg   | 844.68   | 1317.13  | 1799.17  | 2611.96  | 4704.92  | 934.68   | 1356.06  | 1803.50  | 2471.16  | 4256.56  |
| Lycopene, mcg            | 1536.98  | 2987.96  | 3997.52  | 5203.89  | 7972.84  | 2069.55  | 3632.42  | 4829.14  | 6119.80  | 9374.62  |
| Calcium, mg              | 403.29   | 530.19   | 638.57   | 769.75   | 1060.76  | 463.64   | 603.04   | 685.17   | 851.32   | 1133.41  |
| Magnesium, mg            | 199.89   | 231.28   | 245.42   | 265.64   | 288.42   | 245.47   | 265.07   | 284.03   | 300.94   | 320.52   |
| Iron, mg                 | 7.40     | 9.15     | 10.31    | 11.33    | 14.29    | 9.56     | 11.46    | 12.84    | 15.13    | 18.25    |
| Zinc, mg                 | 6.26     | 7.93     | 8.60     | 9.67     | 11.91    | 7.99     | 9.72     | 11.01    | 12.20    | 15.72    |
| Copper, mg               | 0.73     | 0.81     | 0.95     | 1.11     | 1.39     | 0.91     | 1.05     | 1.12     | 1.26     | 1.50     |
| Cholesterol, mg          | 81.18    | 122.84   | 166.20   | 211.73   | 268.02   | 105.27   | 164.80   | 214.89   | 257.92   | 308.31   |
| Saturated Fat, mg        | 9.24     | 13.91    | 17.07    | 20.38    | 25.43    | 12.23    | 17.22    | 21.51    | 25.04    | 31.63    |
| Monounsaturated Fat, mg  | 10.78    | 16.18    | 20.14    | 24.27    | 30.75    | 14.74    | 21.32    | 26.09    | 29.39    | 37.67    |
| Oleic Acid, mg           | 10045.00 | 14880.00 | 18980.00 | 22435.00 | 28990.00 | 13750.00 | 19700.00 | 23740.00 | 27850.00 | 35275.00 |
| Linoleic Acid, mg        | 5730.00  | 8380.00  | 10025.00 | 12300.00 | 15760.00 | 6910.00  | 9950.00  | 11980.00 | 15080.00 | 19490.00 |
| Alpha-Linolenic Acid, mg | 640.00   | 820.00   | 1030.00  | 1260.00  | 1610.00  | 710.00   | 950.00   | 1170.00  | 1440.00  | 1830.00  |
| Arachidonic Acid, mg     | 30.00    | 60.00    | 80.00    | 100.00   | 150.00   | 40.00    | 80.00    | 100.00   | 120.00   | 170.00   |
| EPA, mg                  | 10.00    | 20.00    | 30.00    | 60.00    | 140.00   | 10.00    | 20.00    | 40.00    | 70.00    | 140.00   |
| DHA, mg                  | 20.00    | 40.00    | 60.00    | 100.00   | 220.00   | 20.00    | 50.00    | 70.00    | 110.00   | 220.00   |
| EPA+DHA, mg              | 20.00    | 60.00    | 90.00    | 160.00   | 370.00   | 30.00    | 70.00    | 110.00   | 170.00   | 370.00   |
| Lactose, gm              | 3.66     | 8.46     | 13.14    | 17.76    | 32.33    | 4.10     | 9.35     | 13.66    | 18.52    | 33.09    |
| Alcohol, gm              | 0.00     | 0.25     | 0.89     | 3.29     | 14.12    | 0.00     | 0.85     | 3.67     | 12.25    | 30.09    |

B. AREDS cohort (n=4504 participants)

| Nutrient                       | Female  |          |          |          |          | Male     |          |          |          |          |
|--------------------------------|---------|----------|----------|----------|----------|----------|----------|----------|----------|----------|
|                                | Q1      | Q2       | Q3       | Q4       | Q5       | Q1       | Q2       | Q3       | Q4       | Q5       |
| Vitamin A, IU                  | 3427.92 | 4927.14  | 5778.82  | 7006.53  | 10225.70 | 4145.51  | 5790.94  | 6692.22  | 8167.91  | 10936.14 |
| Retinol, mcg                   | 211.15  | 371.09   | 503.73   | 630.04   | 861.19   | 306.45   | 487.63   | 591.91   | 725.13   | 1061.97  |
| Vitamin D, mcg                 | 2.14    | 3.61     | 4.79     | 5.86     | 8.50     | 2.88     | 4.67     | 5.62     | 6.59     | 9.35     |
| Vitamin E, mg                  | 5.01    | 6.70     | 7.87     | 9.28     | 13.36    | 6.36     | 8.44     | 10.12    | 12.13    | 17.44    |
| Vitamin C, mg                  | 42.23   | 78.77    | 102.34   | 122.80   | 151.68   | 47.19    | 83.27    | 103.95   | 129.76   | 162.08   |
| Thiamine, mg                   | 0.86    | 1.05     | 1.12     | 1.15     | 1.31     | 1.19     | 1.46     | 1.48     | 1.60     | 1.80     |
| Riboflavin, mg                 | 0.89    | 1.26     | 1.32     | 1.51     | 1.91     | 1.33     | 1.61     | 1.82     | 1.92     | 2.33     |
| Niacin, mg                     | 11.19   | 12.92    | 13.97    | 14.39    | 16.46    | 15.53    | 18.56    | 19.30    | 19.24    | 23.48    |
| Vitamin B6, mg                 | 1.01    | 1.17     | 1.33     | 1.44     | 1.71     | 1.38     | 1.63     | 1.77     | 1.92     | 2.27     |
| Folate, mcg                    | 222.33  | 267.83   | 299.20   | 333.72   | 375.82   | 290.15   | 359.98   | 403.63   | 451.18   | 516.93   |
| Vitamin B12, mcg               | 1.77    | 2.83     | 3.49     | 4.40     | 6.14     | 2.67     | 3.93     | 4.86     | 5.80     | 8.53     |
| Beta-Carotene, mcg             | 973.61  | 1596.08  | 2161.35  | 2825.44  | 4386.93  | 1192.53  | 1848.12  | 2430.78  | 3127.83  | 4672.92  |
| Beta-Carotene Equivalents, mcg | 1131.74 | 1818.95  | 2424.41  | 3104.87  | 4916.19  | 1350.28  | 2135.66  | 2753.68  | 3473.09  | 5270.87  |
| Alpha-Carotene, mcg            | 118.32  | 236.90   | 331.38   | 538.15   | 921.22   | 158.25   | 307.43   | 472.64   | 626.67   | 1128.01  |
| Beta-Cryptoxanthin, mcg        | 43.12   | 98.91    | 139.15   | 173.45   | 221.41   | 46.26    | 96.83    | 137.51   | 171.21   | 253.23   |
| Lutein+Zeaxanthin, mcg         | 755.39  | 1047.93  | 1337.06  | 1821.05  | 2726.82  | 897.32   | 1211.68  | 1541.92  | 1962.35  | 2811.13  |
| Lycopene, mcg                  | 1300.75 | 2609.61  | 3539.22  | 4591.06  | 6687.15  | 2113.21  | 3769.47  | 4912.66  | 6198.96  | 8466.13  |
| Calcium, mg                    | 360.18  | 513.16   | 638.61   | 816.22   | 1070.19  | 486.96   | 626.53   | 761.11   | 886.47   | 1176.51  |
| Magnesium, mg                  | 187.21  | 206.75   | 212.35   | 225.41   | 237.88   | 239.46   | 255.59   | 273.32   | 291.32   | 282.01   |
| Iron, mg                       | 6.68    | 8.17     | 8.88     | 9.95     | 12.77    | 9.48     | 11.22    | 12.74    | 14.86    | 18.75    |
| Zinc, mg                       | 5.37    | 6.92     | 7.56     | 8.92     | 11.53    | 7.97     | 9.87     | 10.94    | 12.56    | 15.97    |
| Copper, mg                     | 0.69    | 0.76     | 0.78     | 0.83     | 0.90     | 0.91     | 0.99     | 1.04     | 1.06     | 1.18     |
| Selenium, mcg                  | 50.56   | 64.76    | 69.34    | 70.89    | 78.31    | 73.95    | 89.43    | 93.37    | 100.45   | 99.56    |
| Cholesterol, mg                | 66.90   | 104.07   | 125.93   | 160.42   | 210.22   | 92.12    | 146.69   | 188.36   | 229.11   | 290.02   |
| Saturated Fat, gm              | 7.89    | 11.89    | 15.89    | 19.03    | 26.72    | 11.40    | 17.22    | 22.60    | 26.40    | 35.05    |
| Monounsaturated Fat, gm        | 9.22    | 13.77    | 17.55    | 21.94    | 27.63    | 13.03    | 20.42    | 26.19    | 29.43    | 38.50    |
| Oleic Acid, mg                 | 8580.00 | 13000.00 | 16530.00 | 20905.00 | 26210.00 | 12305.00 | 19170.00 | 24460.00 | 28265.00 | 35585.00 |
| Linoleic Acid, mg              | 5330.00 | 8230.00  | 10630.00 | 13145.00 | 16460.00 | 7310.00  | 10820.00 | 13410.00 | 16405.00 | 21350.00 |
| Alpha-Linolenic Acid, mg       | 560.00  | 790.00   | 1050.00  | 1290.00  | 1580.00  | 695.00   | 1010.00  | 1240.00  | 1490.00  | 1860.00  |
| Arachidonic Acid, mg           | 30.00   | 40.00    | 60.00    | 70.00    | 80.00    | 40.00    | 70.00    | 80.00    | 90.00    | 120.00   |
| EPA, mg                        | 0.00    | 10.00    | 20.00    | 30.00    | 60.00    | 10.00    | 20.00    | 30.00    | 40.00    | 70.00    |
| DHA, mg                        | 10.00   | 30.00    | 40.00    | 50.00    | 80.00    | 20.00    | 30.00    | 50.00    | 70.00    | 100.00   |
| EPA+DHA, mg                    | 10.00   | 40.00    | 60.00    | 80.00    | 140.00   | 25.00    | 50.00    | 80.00    | 110.00   | 170.00   |
| Galactose, gm                  | 0.01    | 0.02     | 0.11     | 0.32     | 0.80     | 0.01     | 0.02     | 0.05     | 0.17     | 0.72     |
| Lactose, gm                    | 5.17    | 9.65     | 14.49    | 20.55    | 32.15    | 6.98     | 11.72    | 15.99    | 21.53    | 33.23    |
| Alcohol, gm                    |         | 0.00     | 0.89     | 2.14     | 13.49    | 0.00     | 0.85     | 2.72     | 10.75    | 27.09    |
| Soluble Dietary Fiber, gm      | 3.39    | 4.28     | 4.59     | 5.28     | 6.08     | 4.58     | 5.49     | 5.86     | 6.50     | 7.10     |
| Insoluble Dietary Fiber, gm    | 5.51    | 7.46     | 8.50     | 9.44     | 10.69    | 7.68     | 9.23     | 10.71    | 11.97    | 13.54    |

C. AREDS2 cohort (n=3738 participants)

| Nutrient                 | Female   |          |          |          |          | Male     |          |          |          |          |
|--------------------------|----------|----------|----------|----------|----------|----------|----------|----------|----------|----------|
|                          | Q1       | Q2       |
| Vitamin A, IU            | 4375.66  | 6381.08  | 8102.93  | 10527.41 | 15240.53 | 3809.59  | 5540.58  | 7036.89  | 9324.36  | 13489.76 |
| Vitamin A, RAE           | 466.86   | 632.66   | 774.77   | 886.33   | 1196.78  | 452.00   | 640.26   | 740.06   | 863.49   | 1175.63  |
| Retinol, mcg             | 170.94   | 273.67   | 367.09   | 475.06   | 691.21   | 178.52   | 309.36   | 421.05   | 493.46   | 770.31   |
| Vitamin D, mcg           | 1.56     | 2.92     | 3.84     | 4.94     | 8.87     | 1.85     | 3.27     | 4.28     | 5.23     | 9.51     |
| Vitamin E, mg            | 4.37     | 5.36     | 6.51     | 7.54     | 10.42    | 4.50     | 5.89     | 6.66     | 7.50     | 10.85    |
| Vitamin C, mg            | 44.56    | 76.07    | 105.45   | 131.66   | 168.30   | 40.32    | 71.38    | 101.88   | 133.47   | 170.45   |
| Thiamine, mg             | 0.98     | 1.24     | 1.33     | 1.33     | 1.58     | 1.10     | 1.38     | 1.43     | 1.51     | 1.78     |
| Riboflavin, mg           | 1.38     | 1.71     | 1.84     | 2.04     | 2.37     | 1.56     | 1.80     | 2.01     | 2.20     | 2.61     |
| Niacin, mg               | 16.02    | 18.36    | 19.64    | 20.83    | 23.88    | 16.90    | 21.13    | 22.10    | 23.27    | 27.05    |
| Vitamin B6, mg           | 1.36     | 1.63     | 1.79     | 1.88     | 2.32     | 1.40     | 1.83     | 1.92     | 2.14     | 2.60     |
| Folate, mcg              | 259.22   | 326.76   | 370.92   | 406.40   | 514.66   | 274.37   | 357.82   | 400.94   | 430.06   | 563.18   |
| Natural Food Folate, mcg | 172.00   | 218.00   | 259.00   | 288.00   | 361.00   | 184.50   | 229.00   | 263.00   | 288.00   | 341.50   |
| Folic Acid, mcg          | 57.00    | 140.00   | 469.00   | 499.50   | 610.00   | 66.50    | 141.50   | 441.00   | 507.50   | 653.50   |
| Vitamin B12, mcg         | 3.02     | 4.30     | 5.46     | 6.24     | 9.11     | 3.28     | 5.15     | 6.15     | 6.89     | 10.99    |
| Beta-Carotene, mcg       | 1594.69  | 2724.50  | 3763.70  | 4970.41  | 7463.54  | 1290.25  | 2157.50  | 2861.92  | 4224.02  | 6575.12  |
| Alpha-Carotene, mcg      | 164.73   | 385.87   | 545.15   | 780.20   | 1526.13  | 140.74   | 339.86   | 456.23   | 697.65   | 1430.87  |
| Beta-Cryptoxanthin, mcg  | 33.92    | 62.51    | 115.17   | 191.06   | 246.05   | 31.41    | 63.58    | 112.86   | 188.87   | 244.19   |
| Lutein+Zeaxanthin, mcg   | 1228.33  | 1952.55  | 2772.95  | 3619.76  | 7131.94  | 1049.46  | 1681.00  | 2491.13  | 3261.04  | 5758.55  |
| Lycopene, mcg            | 1979.17  | 3533.34  | 4407.52  | 5657.61  | 10528.48 | 1981.98  | 3528.32  | 4779.51  | 5968.02  | 10993.79 |
| Calcium, mg              | 226.82   | 269.72   | 283.92   | 300.87   | 332.09   | 243.47   | 278.19   | 297.60   | 318.16   | 345.04   |
| Magnesium, mg            | 425.57   | 543.88   | 624.12   | 724.34   | 1075.54  | 447.79   | 567.01   | 639.09   | 711.56   | 1081.13  |
| Iron, mg                 | 9.10     | 10.34    | 11.66    | 13.00    | 16.21    | 9.74     | 11.71    | 12.50    | 15.14    | 17.82    |
| Zinc, mg                 | 7.47     | 9.02     | 9.62     | 10.39    | 12.83    | 8.05     | 9.65     | 10.68    | 11.99    | 14.67    |
| Copper, mg               | 0.93     | 1.17     | 1.28     | 1.37     | 1.55     | 0.99     | 1.22     | 1.38     | 1.43     | 1.85     |
| Selenium, mcg *          | 0.00     | 20.00    | 20.00    |          |          | 0.00     | 11.40    | 20.00    |          |          |
| Cholesterol, mg          | 130.33   | 183.67   | 215.97   | 264.13   | 285.06   | 143.25   | 206.10   | 260.07   | 270.45   | 334.85   |
| Saturated Fat, gm        | 11.85    | 15.49    | 18.07    | 21.49    | 25.46    | 13.25    | 17.93    | 20.88    | 24.64    | 28.35    |
| Monounsaturated Fat, gm  | 14.32    | 18.74    | 22.97    | 26.90    | 33.55    | 16.80    | 22.38    | 26.32    | 29.28    | 36.93    |
| Oleic Acid, mg           | 13090.00 | 17040.00 | 20910.00 | 24195.00 | 31460.00 | 15320.00 | 20490.00 | 23695.00 | 27710.00 | 34530.00 |
| Linoleic Acid, mg        | 5865.00  | 7885.00  | 9520.00  | 11550.00 | 15370.00 | 6560.00  | 8640.00  | 10130.00 | 12730.00 | 16970.00 |
| Alpha-Linolenic Acid, mg | 670.00   | 850.00   | 1000.00  | 1230.00  | 1670.00  | 700.00   | 890.00   | 1040.00  | 1320.00  | 1795.00  |
| Arachidonic Acid, mg     | 60.00    | 100.00   | 120.00   | 140.00   | 180.00   | 70.00    | 110.00   | 130.00   | 160.00   | 190.00   |
| EPA, mg                  | 10.00    | 30.00    | 70.00    | 100.00   | 310.00   | 20.00    | 40.00    | 70.00    | 100.00   | 320.00   |
| DPA, mg                  | 10.00    | 10.00    | 20.00    | 30.00    | 50.00    | 10.00    | 10.00    | 20.00    | 30.00    | 50.00    |
| DHA, mg                  | 40.00    | 80.00    | 130.00   | 180.00   | 300.00   | 40.00    | 90.00    | 130.00   | 180.00   | 340.00   |
| EPA+DHA, mg              | 60.00    | 110.00   | 200.00   | 280.00   | 590.00   | 60.00    | 120.00   | 210.00   | 270.00   | 630.00   |
| EPA+DPA+DHA, mg          | 70.00    | 120.00   | 190.00   | 260.00   | 390.00   | 70.00    | 120.00   | 200.00   | 260.00   | 410.00   |
| Lactose, gm              | 2.90     | 7.56     | 10.58    | 15.16    | 32.37    | 2.84     | 7.11     | 9.65     | 14.91    | 32.15    |
| Alcohol, gm              | 0.00     | 0.47     | 1.02     | 4.57     | 14.52    | 0.00     | 0.88     | 4.72     | 13.91    | 35.57    |
| Fiber, gm                | 11.53    | 15.07    | 18.07    | 19.68    | 24.79    | 11.53    | 16.12    | 17.69    | 20.47    | 25.37    |
| Total Choline, gm        | 225.68   | 272.29   | 300.74   | 305.43   | 325.66   | 262.91   | 301.95   | 315.46   | 343.40   | 354.31   |
| Free Choline, gm         | 51.24    | 59.48    | 63.55    | 66.86    | 72.27    | 59.86    | 67.70    | 70.23    | 73.17    | 85.12    |
| Glycemic Index           | 50.46    | 50.70    | 51.47    | 52.12    | 52.40    | 51.86    | 52.84    | 53.27    | 53.20    | 53.84    |
| Glycemic Load            | 66.87    | 89.75    | 95.93    | 104.87   | 117.10   | 76.32    | 97.20    | 115.59   | 117.55   | 131.64   |

Abbreviations: DHA=docosahexaenoic acid; DPA=docosapentaenoic acid; EPA=eicosapentaenoic acid; IU=international units; RAE=retinol activity equivalents; Q=quintile

\* shown in tertiles
