# Supplementary material
Source: PubMed Central journal article supplement (PMC7902480)
Supplement: NIHMS1624410-supplement-5.pdf [file NIHMS1624410-supplement-5.pdf]

Supplementary Table 3. Correlation matrix showing the Pearson correlation coefficients between the dietary intake of each nutrient and every other nutrient. Gray indicates correlation coefficients > 0.6.

A. AREDS.

| Nutrient                       |         | aiu | ret | vitd | vite | vitc | b1  | ribo | niac | b6  | fol | b12 | bcar | proa | acar | cryp | lut | lyc | calc | mg  | fe  | zinc | cu  | sel | sfat | mufa | chol | olec | pufa182 | pufa183 | epa | dha | omega | pufa204 | gal | lact | alc | ifib | sfib |     |
|--------------------------------|---------|-----|-----|------|------|------|-----|------|------|-----|-----|-----|------|------|------|------|-----|-----|------|-----|-----|------|-----|-----|------|------|------|------|---------|---------|-----|-----|-------|---------|-----|------|-----|------|------|-----|
| Vitamin A, IU                  | aiu     | 1.0 | 0.5 | 0.4  | 0.4  | 0.5  | 0.6 | 0.6  | 0.5  | 0.6 | 0.6 | 0.5 | 0.9  | 0.9  | 0.8  | 0.4  | 0.7 | 0.5 | 0.5  | 0.6 | 0.5 | 0.5  | 0.7 | 0.6 | 0.4  | 0.4  | 0.4  | 0.4  | 0.4     | 0.4     | 0.3 | 0.4 | 0.4   | 0.4     | 0.2 | 0.4  | 0.0 | 0.7  | 0.7  |     |
| Retinol, mcg                   | ret     | 0.5 | 1.0 | 0.7  | 0.4  | 0.2  | 0.6 | 0.7  | 0.5  | 0.5 | 0.5 | 0.9 | 0.2  | 0.2  | 0.2  | 0.1  | 0.2 | 0.2 | 0.6  | 0.5 | 0.5 | 0.6  | 0.6 | 0.6 | 0.6  | 0.5  | 0.6  | 0.5  | 0.4     | 0.2     | 0.4 | 0.3 | 0.5   | 0.0     | 0.6 | 0.0  | 0.3 | 0.3  |      |     |
| Vitamin D, mcg                 | vitd    | 0.4 | 0.7 | 1.0  | 0.4  | 0.3  | 0.6 | 0.8  | 0.5  | 0.5 | 0.5 | 0.6 | 0.2  | 0.2  | 0.2  | 0.2  | 0.2 | 0.3 | 0.9  | 0.7 | 0.4 | 0.6  | 0.5 | 0.6 | 0.5  | 0.5  | 0.4  | 0.5  | 0.4     | 0.4     | 0.2 | 0.3 | 0.2   | 0.3     | 0.1 | 0.9  | 0.0 | 0.4  | 0.4  |     |
| Vitamin E, mcg                 | vite    | 0.4 | 0.4 | 0.4  | 1.0  | 0.4  | 0.8 | 0.7  | 0.8  | 0.8 | 0.7 | 0.6 | 0.3  | 0.3  | 0.3  | 0.2  | 0.3 | 0.3 | 0.4  | 0.6 | 0.8 | 0.7  | 0.5 | 0.6 | 0.5  | 0.6  | 0.4  | 0.6  | 0.7     | 0.6     | 0.2 | 0.3 | 0.3   | 0.4     | 0.1 | 0.3  | 0.1 | 0.5  | 0.5  |     |
| Vitamin C, mg                  | vitc    | 0.5 | 0.2 | 0.3  | 0.4  | 1.0  | 0.5 | 0.4  | 0.4  | 0.6 | 0.6 | 0.3 | 0.5  | 0.5  | 0.3  | 0.8  | 0.4 | 0.4 | 0.3  | 0.5 | 0.4 | 0.4  | 0.5 | 0.4 | 0.2  | 0.2  | 0.2  | 0.2  | 0.3     | 0.3     | 0.3 | 0.3 | 0.3   | 0.2     | 0.1 | 0.2  | 0.0 | 0.5  | 0.6  |     |
| Thiamin, mg                    | b1      | 0.6 | 0.6 | 0.6  | 0.8  | 0.5  | 1.0 | 0.9  | 0.9  | 0.9 | 0.9 | 0.7 | 0.4  | 0.4  | 0.4  | 0.4  | 0.4 | 0.5 | 0.7  | 0.8 | 0.9 | 0.8  | 0.8 | 0.8 | 0.6  | 0.6  | 0.5  | 0.6  | 0.6     | 0.5     | 0.3 | 0.3 | 0.3   | 0.5     | 0.1 | 0.5  | 0.1 | 0.7  | 0.7  |     |
| Riboflavin, mg                 | ribo    | 0.6 | 0.7 | 0.8  | 0.7  | 0.4  | 0.9 | 1.0  | 0.8  | 0.8 | 0.8 | 0.8 | 0.4  | 0.4  | 0.3  | 0.3  | 0.3 | 0.4 | 0.9  | 0.8 | 0.8 | 0.8  | 0.7 | 0.8 | 0.6  | 0.6  | 0.5  | 0.6  | 0.5     | 0.5     | 0.2 | 0.3 | 0.3   | 0.5     | 0.2 | 0.8  | 0.1 | 0.6  | 0.6  |     |
| Niacin, mg                     | niac    | 0.5 | 0.5 | 0.5  | 0.8  | 0.4  | 0.9 | 0.8  | 1.0  | 0.9 | 0.9 | 0.7 | 0.4  | 0.4  | 0.4  | 0.3  | 0.4 | 0.5 | 0.5  | 0.8 | 0.9 | 0.8  | 0.8 | 0.8 | 0.6  | 0.6  | 0.5  | 0.6  | 0.6     | 0.5     | 0.3 | 0.4 | 0.4   | 0.5     | 0.1 | 0.3  | 0.1 | 0.7  | 0.7  |     |
| Vitamin B6, mg                 | b6      | 0.6 | 0.5 | 0.5  | 0.8  | 0.6  | 0.9 | 0.8  | 0.9  | 1.0 | 0.9 | 0.7 | 0.5  | 0.5  | 0.4  | 0.4  | 0.4 | 0.4 | 0.6  | 0.8 | 0.9 | 0.8  | 0.7 | 0.7 | 0.4  | 0.5  | 0.4  | 0.5  | 0.5     | 0.4     | 0.3 | 0.4 | 0.4   | 0.4     | 0.2 | 0.4  | 0.1 | 0.8  | 0.7  |     |
| Folate, mcg                    | fol     | 0.6 | 0.5 | 0.5  | 0.7  | 0.6  | 0.9 | 0.8  | 0.9  | 0.9 | 1.0 | 0.6 | 0.4  | 0.5  | 0.4  | 0.5  | 0.5 | 0.5 | 0.5  | 0.7 | 0.9 | 0.8  | 0.7 | 0.7 | 0.4  | 0.5  | 0.3  | 0.5  | 0.5     | 0.4     | 0.3 | 0.3 | 0.3   | 0.4     | 0.1 | 0.4  | 0.1 | 0.7  | 0.7  |     |
| Vitamin B12, mcg               | b12     | 0.5 | 0.9 | 0.6  | 0.6  | 0.3  | 0.7 | 0.8  | 0.7  | 0.7 | 0.6 | 1.0 | 0.3  | 0.3  | 0.2  | 0.2  | 0.3 | 0.3 | 0.6  | 0.6 | 0.7 | 0.8  | 0.7 | 0.6 | 0.4  | 0.4  | 0.5  | 0.4  | 0.3     | 0.4     | 0.3 | 0.5 | 0.4   | 0.5     | 0.1 | 0.5  | 0.1 | 0.4  | 0.4  |     |
| Beta-carotene, mcg             | bcar    | 0.9 | 0.2 | 0.2  | 0.3  | 0.5  | 0.4 | 0.4  | 0.4  | 0.5 | 0.4 | 0.3 | 1.0  | 1.0  | 0.8  | 0.4  | 0.7 | 0.5 | 0.3  | 0.5 | 0.4 | 0.4  | 0.6 | 0.4 | 0.2  | 0.2  | 0.2  | 0.2  | 0.3     | 0.3     | 0.3 | 0.4 | 0.3   | 0.3     | 0.2 | 0.2  | 0.0 | 0.6  | 0.7  |     |
| Beta-carotene equivalents, mcg | proa    | 0.9 | 0.2 | 0.2  | 0.3  | 0.5  | 0.4 | 0.4  | 0.4  | 0.5 | 0.5 | 0.3 | 1.0  | 1.0  | 0.8  | 0.4  | 0.7 | 0.5 | 0.3  | 0.5 | 0.4 | 0.4  | 0.6 | 0.4 | 0.2  | 0.2  | 0.2  | 0.2  | 0.3     | 0.3     | 0.3 | 0.4 | 0.3   | 0.3     | 0.2 | 0.2  | 0.0 | 0.6  | 0.7  |     |
| Alpha-carotene, mcg            | acar    | 0.8 | 0.2 | 0.2  | 0.3  | 0.3  | 0.4 | 0.3  | 0.4  | 0.4 | 0.4 | 0.2 | 0.8  | 0.8  | 1.0  | 0.3  | 0.4 | 0.3 | 0.3  | 0.4 | 0.3 | 0.3  | 0.5 | 0.4 | 0.2  | 0.2  | 0.2  | 0.2  | 0.3     | 0.3     | 0.2 | 0.2 | 0.2   | 0.2     | 0.1 | 0.2  | 0.0 | 0.5  | 0.6  |     |
| Beta-cryptoxanthin, mcg        | cryp    | 0.4 | 0.1 | 0.2  | 0.2  | 0.8  | 0.4 | 0.3  | 0.3  | 0.4 | 0.5 | 0.2 | 0.4  | 0.4  | 0.3  | 1.0  | 0.4 | 0.3 | 0.2  | 0.4 | 0.3 | 0.3  | 0.5 | 0.3 | 0.1  | 0.1  | 0.1  | 0.1  | 0.2     | 0.2     | 0.2 | 0.2 | 0.2   | 0.2     | 0.2 | 0.1  | 0.0 | 0.5  | 0.6  |     |
| Lutein and zeaxanthin, mcg     | lut     | 0.7 | 0.2 | 0.2  | 0.3  | 0.4  | 0.4 | 0.3  | 0.4  | 0.4 | 0.5 | 0.3 | 0.7  | 0.7  | 0.4  | 0.4  | 1.0 | 0.4 | 0.3  | 0.5 | 0.3 | 0.3  | 0.5 | 0.4 | 0.2  | 0.2  | 0.2  | 0.2  | 0.3     | 0.3     | 0.3 | 0.4 | 0.3   | 0.3     | 0.1 | 0.1  | 0.1 | 0.6  | 0.6  |     |
| Lycopene, mcg                  | lyc     | 0.5 | 0.2 | 0.3  | 0.3  | 0.4  | 0.5 | 0.4  | 0.5  | 0.4 | 0.5 | 0.3 | 0.5  | 0.5  | 0.3  | 0.3  | 0.4 | 1.0 | 0.3  | 0.5 | 0.4 | 0.4  | 0.6 | 0.6 | 0.3  | 0.3  | 0.3  | 0.3  | 0.3     | 0.4     | 0.3 | 0.3 | 0.3   | 0.3     | 0.1 | 0.2  | 0.1 | 0.5  | 0.6  |     |
| Calcium, mg                    | calc    | 0.5 | 0.6 | 0.9  | 0.4  | 0.3  | 0.7 | 0.9  | 0.5  | 0.6 | 0.5 | 0.6 | 0.3  | 0.3  | 0.3  | 0.2  | 0.3 | 0.3 | 1.0  | 0.8 | 0.5 | 0.6  | 0.6 | 0.6 | 0.5  | 0.5  | 0.4  | 0.5  | 0.4     | 0.4     | 0.2 | 0.2 | 0.2   | 0.3     | 0.3 | 0.9  | 0.0 | 0.5  | 0.5  |     |
| Magnesium, mg                  | mg      | 0.6 | 0.5 | 0.7  | 0.6  | 0.5  | 0.8 | 0.8  | 0.8  | 0.8 | 0.7 | 0.6 | 0.5  | 0.5  | 0.4  | 0.4  | 0.5 | 0.5 | 0.8  | 1.0 | 0.7 | 0.7  | 0.8 | 0.8 | 0.6  | 0.6  | 0.5  | 0.6  | 0.6     | 0.5     | 0.4 | 0.4 | 0.4   | 0.4     | 0.2 | 0.7  | 0.1 | 0.9  | 0.8  |     |
| Iron, mg                       | fe      | 0.5 | 0.5 | 0.4  | 0.8  | 0.4  | 0.9 | 0.8  | 0.9  | 0.9 | 0.9 | 0.7 | 0.4  | 0.4  | 0.3  | 0.3  | 0.3 | 0.4 | 0.5  | 0.7 | 1.0 | 0.8  | 0.7 | 0.7 | 0.5  | 0.5  | 0.4  | 0.5  | 0.5     | 0.4     | 0.3 | 0.3 | 0.3   | 0.4     | 0.1 | 0.3  | 0.1 | 0.7  | 0.6  |     |
| Zinc, mg                       | zinc    | 0.5 | 0.6 | 0.6  | 0.7  | 0.4  | 0.8 | 0.8  | 0.8  | 0.8 | 0.8 | 0.8 | 0.4  | 0.4  | 0.3  | 0.3  | 0.3 | 0.4 | 0.6  | 0.7 | 0.8 | 1.0  | 0.8 | 0.7 | 0.5  | 0.5  | 0.5  | 0.5  | 0.4     | 0.4     | 0.4 | 0.4 | 0.4   | 0.4     | 0.5 | 0.2  | 0.5 | 0.1  | 0.6  | 0.6 |
| Copper, mg                     | cu      | 0.7 | 0.6 | 0.5  | 0.5  | 0.5  | 0.8 | 0.7  | 0.8  | 0.7 | 0.7 | 0.7 | 0.6  | 0.6  | 0.5  | 0.5  | 0.6 | 0.6 | 0.6  | 0.8 | 0.7 | 0.8  | 1.0 | 0.8 | 0.6  | 0.6  | 0.5  | 0.6  | 0.6     | 0.6     | 0.4 | 0.5 | 0.5   | 0.6     | 0.2 | 0.4  | 0.1 | 0.8  | 0.8  |     |
| Selenium, mcg                  | sel     | 0.6 | 0.6 | 0.6  | 0.6  | 0.4  | 0.8 | 0.8  | 0.8  | 0.7 | 0.7 | 0.6 | 0.4  | 0.4  | 0.4  | 0.3  | 0.4 | 0.6 | 0.6  | 0.8 | 0.7 | 0.7  | 0.8 | 1.0 | 0.7  | 0.8  | 0.7  | 0.8  | 0.7     | 0.6     | 0.5 | 0.6 | 0.5   | 0.7     | 0.1 | 0.5  | 0.1 | 0.7  | 0.7  |     |
| Saturated fat, gm              | sfat    | 0.4 | 0.6 | 0.5  | 0.5  | 0.2  | 0.6 | 0.6  | 0.6  | 0.4 | 0.4 | 0.4 | 0.2  | 0.2  | 0.2  | 0.1  | 0.2 | 0.3 | 0.5  | 0.6 | 0.5 | 0.5  | 0.6 | 0.7 | 1.0  | 0.9  | 0.8  | 0.9  | 0.7     | 0.7     | 0.1 | 0.2 | 0.2   | 0.6     | 0.0 | 0.4  | 0.1 | 0.3  | 0.4  |     |
| Monounsaturated fat, gm        | mufa    | 0.4 | 0.5 | 0.5  | 0.6  | 0.2  | 0.6 | 0.6  | 0.6  | 0.5 | 0.5 | 0.4 | 0.2  | 0.2  | 0.2  | 0.1  | 0.2 | 0.3 | 0.5  | 0.6 | 0.5 | 0.5  | 0.6 | 0.8 | 0.9  | 1.0  | 0.7  | 1.0  | 0.8     | 0.8     | 0.2 | 0.3 | 0.2   | 0.6     | 0.0 | 0.3  | 0.1 | 0.4  | 0.5  |     |
| Cholesterol, mg                | chol    | 0.4 | 0.6 | 0.4  | 0.4  | 0.2  | 0.5 | 0.5  | 0.5  | 0.4 | 0.3 | 0.5 | 0.2  | 0.2  | 0.2  | 0.1  | 0.2 | 0.3 | 0.4  | 0.5 | 0.4 | 0.5  | 0.5 | 0.7 | 0.8  | 0.7  | 1.0  | 0.7  | 0.5     | 0.6     | 0.3 | 0.4 | 0.4   | 0.9     | 0.0 | 0.3  | 0.1 | 0.3  | 0.3  |     |
| Oleic acid, gm                 | olec    | 0.4 | 0.5 | 0.5  | 0.6  | 0.2  | 0.6 | 0.6  | 0.6  | 0.5 | 0.5 | 0.4 | 0.2  | 0.2  | 0.2  | 0.1  | 0.2 | 0.3 | 0.5  | 0.6 | 0.5 | 0.5  | 0.6 | 0.8 | 0.9  | 1.0  | 0.7  | 1.0  | 0.9     | 0.8     | 0.2 | 0.3 | 0.2   | 0.6     | 0.0 | 0.3  | 0.1 | 0.4  | 0.5  |     |
| Linoleic acid, gm              | pufa182 | 0.4 | 0.4 | 0.4  | 0.7  | 0.3  | 0.6 | 0.5  | 0.6  | 0.5 | 0.5 | 0.3 | 0.3  | 0.3  | 0.3  | 0.2  | 0.3 | 0.3 | 0.4  | 0.6 | 0.5 | 0.4  | 0.6 | 0.7 | 0.7  | 0.8  | 0.5  | 0.9  | 1.0     | 0.9     | 0.2 | 0.3 | 0.3   | 0.5     | 0.0 | 0.2  | 0.1 | 0.5  | 0.6  |     |
| Linolenic acid, gm             | pufa183 | 0.4 | 0.4 | 0.4  | 0.6  | 0.3  | 0.5 | 0.5  | 0.5  | 0.4 | 0.4 | 0.4 | 0.3  | 0.3  | 0.3  | 0.2  | 0.3 | 0.4 | 0.4  | 0.5 | 0.4 | 0.4  | 0.6 | 0.6 | 0.7  | 0.8  | 0.6  | 0.8  | 0.9     | 1.0     | 0.2 | 0.3 | 0.3   | 0.5     | 0.0 | 0.3  | 0.1 | 0.4  | 0.5  |     |
| EPA, gm                        | epa     | 0.3 | 0.2 | 0.2  | 0.2  | 0.3  | 0.3 | 0.2  | 0.3  | 0.3 | 0.3 | 0.3 | 0.3  | 0.2  | 0.2  | 0.3  | 0.3 | 0.2 | 0.4  | 0.3 | 0.4 | 0.4  | 0.5 | 0.1 | 0.2  | 0.3  | 0.2  | 0.2  | 0.2     | 1.0     | 0.9 | 1.0 | 0.4   | 0.1     | 0.1 | 0.1  | 0.3 | 0.3  |      |     |
| DHA, gm                        | dha     | 0.4 | 0.4 | 0.3  | 0.3  | 0.3  | 0.3 | 0.3  | 0.4  | 0.4 | 0.3 | 0.5 | 0.4  | 0.4  | 0.2  | 0.2  | 0.4 | 0.3 | 0.2  | 0.4 | 0.3 | 0.4  | 0.5 | 0.6 | 0.2  | 0.3  | 0.4  | 0.3  | 0.3     | 0.3     | 0.9 | 1.0 | 1.0   | 0.6     | 0.1 | 0.1  | 0.1 | 0.4  | 0.4  |     |
| EPA+DHA, gm                    | omega   | 0.4 | 0.3 | 0.2  | 0.3  | 0.3  | 0.3 | 0.3  | 0.4  | 0.4 | 0.3 | 0.4 | 0.3  | 0.3  | 0.2  | 0.2  | 0.3 | 0.3 | 0.2  | 0.4 | 0.3 | 0.4  | 0.5 | 0.5 | 0.2  | 0.2  | 0.4  | 0.2  | 0.3     | 0.3     | 1.0 | 1.0 | 1.0   | 0.5     | 0.1 | 0.1  | 0.1 | 0.3  | 0.4  |     |
| Arachidonic acid, gm           | pufa204 | 0.4 | 0.5 | 0.3  | 0.4  | 0.2  | 0.5 | 0.5  | 0.5  | 0.4 | 0.4 | 0.5 | 0.3  | 0.3  | 0.2  | 0.2  |     |     |      |     |     |      |     |     |      |      |      |      |         |         |     |     |       |         |     |      |     |      |      |     |

B. AREDS2

| Nutrient                   | Variable | aiu | rae | ret | vitd | vite | vitc | b1  | ribo | niac | b6  | fol | foodfol | folic | b12 | bcar | acar | cryp | lut | lyc | calc | mg  | fe  |
|----------------------------|----------|-----|-----|-----|------|------|------|-----|------|------|-----|-----|---------|-------|-----|------|------|------|-----|-----|------|-----|-----|
| Vitamin A, IU              | aiu      | 1.0 | 0.8 | 0.3 | 0.4  | 0.5  | 0.6  | 0.5 | 0.5  | 0.5  | 0.6 | 0.6 | 0.8     | 0.1   | 0.4 | 1.0  | 0.8  | 0.5  | 0.8 | 0.3 | 0.5  | 0.6 | 0.5 |
| Vitamin A, RAE             | rae      | 0.8 | 1.0 | 0.8 | 0.4  | 0.4  | 0.4  | 0.5 | 0.6  | 0.5  | 0.6 | 0.6 | 0.6     | 0.1   | 0.8 | 0.6  | 0.5  | 0.3  | 0.5 | 0.2 | 0.6  | 0.6 | 0.5 |
| Retinol, mcg               | ret      | 0.3 | 0.8 | 1.0 | 0.3  | 0.2  | 0.1  | 0.4 | 0.6  | 0.4  | 0.4 | 0.3 | 0.3     | 0.1   | 0.9 | 0.1  | 0.1  | 0.1  | 0.0 | 0.1 | 0.4  | 0.3 | 0.4 |
| Vitamin D, mcg             | vitd     | 0.4 | 0.4 | 0.3 | 1.0  | 0.4  | 0.3  | 0.4 | 0.6  | 0.4  | 0.5 | 0.4 | 0.4     | 0.2   | 0.4 | 0.3  | 0.2  | 0.2  | 0.3 | 0.1 | 0.7  | 0.5 | 0.4 |
| Vitamin E, mg              | vite     | 0.5 | 0.4 | 0.2 | 0.4  | 1.0  | 0.4  | 0.7 | 0.6  | 0.7  | 0.7 | 0.7 | 0.6     | 0.2   | 0.4 | 0.5  | 0.3  | 0.3  | 0.4 | 0.4 | 0.5  | 0.7 | 0.7 |
| Vitamin C, mg              | vitc     | 0.6 | 0.4 | 0.1 | 0.3  | 0.4  | 1.0  | 0.5 | 0.4  | 0.4  | 0.5 | 0.6 | 0.8     | 0.1   | 0.2 | 0.6  | 0.4  | 0.8  | 0.5 | 0.3 | 0.4  | 0.6 | 0.4 |
| Thiamine, mg               | b1       | 0.5 | 0.5 | 0.4 | 0.4  | 0.7  | 0.5  | 1.0 | 0.8  | 0.8  | 0.8 | 0.8 | 0.6     | 0.3   | 0.5 | 0.4  | 0.3  | 0.4  | 0.3 | 0.3 | 0.6  | 0.8 | 0.9 |
| Riboflavin, mg             | ribo     | 0.5 | 0.6 | 0.6 | 0.6  | 0.6  | 0.4  | 0.8 | 1.0  | 0.7  | 0.8 | 0.7 | 0.6     | 0.3   | 0.6 | 0.4  | 0.3  | 0.3  | 0.3 | 0.3 | 0.8  | 0.7 | 0.7 |
| Niacin, mg                 | niac     | 0.5 | 0.5 | 0.4 | 0.4  | 0.7  | 0.4  | 0.8 | 0.7  | 1.0  | 0.8 | 0.8 | 0.6     | 0.2   | 0.5 | 0.4  | 0.3  | 0.3  | 0.3 | 0.4 | 0.5  | 0.8 | 0.8 |
| Vitamin B6, mg             | b6       | 0.6 | 0.6 | 0.4 | 0.5  | 0.7  | 0.5  | 0.8 | 0.8  | 0.8  | 1.0 | 0.9 | 0.7     | 0.3   | 0.6 | 0.5  | 0.4  | 0.3  | 0.4 | 0.3 | 0.6  | 0.8 | 0.8 |
| Folate, mcg                | fol      | 0.6 | 0.6 | 0.3 | 0.4  | 0.7  | 0.6  | 0.8 | 0.7  | 0.8  | 0.9 | 1.0 | 0.8     | 0.3   | 0.5 | 0.6  | 0.4  | 0.5  | 0.5 | 0.3 | 0.6  | 0.8 | 0.8 |
| Natural food folate, mcg   | foodfol  | 0.8 | 0.6 | 0.3 | 0.4  | 0.6  | 0.8  | 0.6 | 0.6  | 0.6  | 0.7 | 0.8 | 1.0     | 0.2   | 0.4 | 0.7  | 0.5  | 0.6  | 0.7 | 0.4 | 0.6  | 0.8 | 0.6 |
| Folic acid, mcg            | folic    | 0.1 | 0.1 | 0.1 | 0.2  | 0.2  | 0.1  | 0.3 | 0.3  | 0.2  | 0.3 | 0.3 | 0.2     | 1.0   | 0.2 | 0.1  | 0.1  | 0.1  | 0.1 | 0.1 | 0.2  | 0.2 | 0.3 |
| Vitamin B12, mcg           | b12      | 0.4 | 0.8 | 0.9 | 0.4  | 0.4  | 0.2  | 0.5 | 0.6  | 0.5  | 0.6 | 0.5 | 0.4     | 0.2   | 1.0 | 0.2  | 0.2  | 0.2  | 0.1 | 0.1 | 0.4  | 0.4 | 0.5 |
| Beta-carotene, mcg         | bcar     | 1.0 | 0.6 | 0.1 | 0.3  | 0.5  | 0.6  | 0.4 | 0.4  | 0.4  | 0.5 | 0.6 | 0.7     | 0.1   | 0.2 | 1.0  | 0.8  | 0.4  | 0.8 | 0.3 | 0.4  | 0.6 | 0.4 |
| Alpha-carotene, mcg        | acar     | 0.8 | 0.5 | 0.1 | 0.2  | 0.3  | 0.4  | 0.3 | 0.3  | 0.3  | 0.4 | 0.4 | 0.5     | 0.1   | 0.2 | 0.8  | 1.0  | 0.4  | 0.4 | 0.2 | 0.3  | 0.5 | 0.3 |
| Beta-cryptoxanthin, mcg    | cryp     | 0.5 | 0.3 | 0.1 | 0.2  | 0.3  | 0.8  | 0.4 | 0.3  | 0.3  | 0.3 | 0.5 | 0.6     | 0.1   | 0.2 | 0.4  | 0.4  | 1.0  | 0.3 | 0.1 | 0.3  | 0.4 | 0.3 |
| Lutein and zeaxanthin, mcg | lut      | 0.8 | 0.5 | 0.0 | 0.3  | 0.4  | 0.5  | 0.3 | 0.3  | 0.3  | 0.4 | 0.5 | 0.7     | 0.1   | 0.1 | 0.8  | 0.4  | 0.3  | 1.0 | 0.2 | 0.3  | 0.5 | 0.3 |
| Lycopene, mcg              | lyc      | 0.3 | 0.2 | 0.1 | 0.1  | 0.4  | 0.3  | 0.3 | 0.3  | 0.4  | 0.3 | 0.3 | 0.4     | 0.1   | 0.1 | 0.3  | 0.2  | 0.1  | 0.2 | 1.0 | 0.2  | 0.4 | 0.3 |
| Calcium, mg                | calc     | 0.5 | 0.6 | 0.4 | 0.7  | 0.5  | 0.4  | 0.6 | 0.8  | 0.5  | 0.6 | 0.6 | 0.6     | 0.2   | 0.4 | 0.4  | 0.3  | 0.3  | 0.3 | 0.2 | 1.0  | 0.7 | 0.5 |
| Magnesium, mg              | mg       | 0.6 | 0.6 | 0.3 | 0.5  | 0.7  | 0.6  | 0.8 | 0.7  | 0.8  | 0.8 | 0.8 | 0.8     | 0.2   | 0.4 | 0.6  | 0.5  | 0.4  | 0.5 | 0.4 | 0.7  | 1.0 | 0.7 |
| Iron, mg                   | fe       | 0.5 | 0.5 | 0.4 | 0.4  | 0.7  | 0.4  | 0.9 | 0.7  | 0.8  | 0.8 | 0.8 | 0.6     | 0.3   | 0.5 | 0.4  | 0.3  | 0.3  | 0.3 | 0.3 | 0.5  | 0.7 | 1.0 |
| Zinc, mg                   | zinc     | 0.4 | 0.5 | 0.4 | 0.4  | 0.7  | 0.4  | 0.9 | 0.8  | 0.9  | 0.8 | 0.7 | 0.5     | 0.3   | 0.6 | 0.3  | 0.3  | 0.2  | 0.2 | 0.3 | 0.7  | 0.7 | 0.8 |
| Copper, mg                 | cu       | 0.5 | 0.8 | 0.8 | 0.3  | 0.5  | 0.4  | 0.5 | 0.6  | 0.6  | 0.5 | 0.5 | 0.6     | 0.1   | 0.8 | 0.4  | 0.3  | 0.3  | 0.3 | 0.3 | 0.4  | 0.6 | 0.5 |
| Selenium, mcg              | sel      | 0.1 | 0.0 | 0.0 | 0.1  | 0.1  | 0.0  | 0.0 | 0.0  | 0.0  | 0.0 | 0.0 | 0.1     | 0.3   | 0.0 | 0.1  | 0.0  | 0.0  | 0.1 | 0.0 | 0.0  | 0.1 | 0.0 |
| Cholesterol, mg            | chol     | 0.3 | 0.4 | 0.4 | 0.3  | 0.4  | 0.2  | 0.5 | 0.5  | 0.6  | 0.4 | 0.3 | 0.4     | 0.1   | 0.5 | 0.2  | 0.1  | 0.1  | 0.2 | 0.2 | 0.4  | 0.4 | 0.4 |
| Saturated fat, gm          | sfat     | 0.2 | 0.4 | 0.4 | 0.3  | 0.5  | 0.2  | 0.6 | 0.6  | 0.6  | 0.5 | 0.4 | 0.4     | 0.1   | 0.4 | 0.1  | 0.1  | 0.2  | 0.1 | 0.2 | 0.6  | 0.5 | 0.5 |
| Monounsaturated fat, gm    | mfat     | 0.3 | 0.4 | 0.3 | 0.3  | 0.7  | 0.3  | 0.6 | 0.5  | 0.6  | 0.5 | 0.5 | 0.5     | 0.1   | 0.4 | 0.3  | 0.2  | 0.2  | 0.2 | 0.3 | 0.4  | 0.6 | 0.5 |
| Oleic Acid, gm             | olec     | 0.3 | 0.4 | 0.3 | 0.3  | 0.7  | 0.3  | 0.5 | 0.5  | 0.6  | 0.5 | 0.4 | 0.5     | 0.1   | 0.3 | 0.3  | 0.2  | 0.2  | 0.2 | 0.3 | 0.4  | 0.6 | 0.5 |
| Linoleic acid, gm          | pufa182  | 0.3 | 0.3 | 0.2 | 0.2  | 0.7  | 0.2  | 0.5 | 0.5  | 0.6  | 0.5 | 0.4 | 0.4     | 0.1   | 0.3 | 0.2  | 0.2  | 0.2  | 0.2 | 0.2 | 0.4  | 0.6 | 0.5 |
| Alpha-linolenic acid, gm   | pufa183  | 0.3 | 0.3 | 0.2 | 0.2  | 0.5  | 0.2  | 0.4 | 0.4  | 0.4  | 0.4 | 0.4 | 0.4     | 0.1   | 0.2 | 0.3  | 0.2  | 0.2  | 0.2 | 0.2 | 0.3  | 0.5 | 0.4 |
| EPA, gm                    | epa      | 0.2 | 0.2 | 0.1 | 0.4  | 0.2  | 0.2  | 0.1 | 0.2  | 0.2  | 0.2 | 0.2 | 0.2     | 0.1   | 0.2 | 0.2  | 0.1  | 0.1  | 0.2 | 0.1 | 0.2  | 0.2 | 0.1 |
| DPA, gm                    | dpa      | 0.3 | 0.2 | 0.1 | 0.5  | 0.3  | 0.2  | 0.2 | 0.2  | 0.4  | 0.3 | 0.3 | 0.3     | 0.1   | 0.2 | 0.3  | 0.2  | 0.1  | 0.3 | 0.2 | 0.2  | 0.4 | 0.2 |
| DHA, gm                    | dha      | 0.3 | 0.2 | 0.1 | 0.6  | 0.3  | 0.2  | 0.2 | 0.2  | 0.3  | 0.3 | 0.3 | 0.3     | 0.1   | 0.2 | 0.3  | 0.2  | 0.1  | 0.3 | 0.1 | 0.2  | 0.3 | 0.2 |
| EPA+DHA, gm                | omega    | 0.3 | 0.2 | 0.1 | 0.5  | 0.2  | 0.2  | 0.2 | 0.2  | 0.3  | 0.2 | 0.2 | 0.3     | 0.1   | 0.2 | 0.3  | 0.2  | 0.1  | 0.3 | 0.1 | 0.2  | 0.3 | 0.2 |
| EPA+DPA+DHA, gm            | lcn3     | 0.4 | 0.2 | 0.0 | 0.7  | 0.3  | 0.3  | 0.3 | 0.2  | 0.4  | 0.4 | 0.3 | 0.4     | 0.1   | 0.3 | 0.4  | 0.2  | 0.2  | 0.4 | 0.2 | 0.2  | 0.4 | 0.3 |
| Arachidonic acid, gm       | pufa204  | 0.3 | 0.4 | 0.3 | 0.3  | 0.4  | 0.2  | 0.4 | 0.4  | 0.7  | 0.5 | 0.3 | 0.4     | 0.1   | 0.4 | 0.3  | 0.2  | 0.1  | 0.2 | 0.3 | 0.3  | 0.4 | 0.4 |
| Lactose, gm                | lact     | 0.3 | 0.4 | 0.4 | 0.6  | 0.2  | 0.2  | 0.4 | 0.7  | 0.3  | 0.4 | 0.3 | 0.3     | 0.1   | 0.4 | 0.2  | 0.2  | 0.2  | 0.1 | 0.1 | 0.9  | 0.5 | 0.3 |
| Alcohol, gm                | alc      | 0.0 | 0.0 | 0.0 | 0.1  | 0.1  | 0.1  | 0.1 | 0.1  | 0.2  | 0.1 | 0.1 | 0.2     | 0.0   | 0.0 | 0.0  | 0.0  | 0.0  | 0.1 | 0.1 | 0.0  | 0.2 | 0.1 |
| Fiber, gm                  | fib      | 0.7 | 0.5 | 0.2 | 0.4  | 0.6  | 0.6  | 0.7 | 0.6  | 0.6  | 0.7 | 0.7 | 0.8     | 0.2   | 0.3 | 0.7  | 0.5  | 0.5  | 0.3 | 0.5 | 0.9  | 0.7 |     |
| Total choline, mg          | tcholn   | 0.5 | 0.6 | 0.5 | 0.5  | 0.6  | 0.4  | 0.7 | 0.8  | 0.8  | 0.7 | 0.6 | 0.7     | 0.1   | 0.6 | 0.4  | 0.4  | 0.3  | 0.3 | 0.3 | 0.7  | 0.8 | 0.6 |
| Free choline, mg           | fcholn   | 0.6 | 0.6 | 0.4 | 0.5  | 0.6  | 0.5  | 0.7 | 0.7  | 0.7  | 0.7 | 0.7 | 0.8     | 0.2   | 0.4 | 0.5  | 0.4  | 0.4  | 0.4 | 0.4 | 0.7  | 0.9 | 0.6 |
| Glycemic index             | gid      | -3  | -1  | 0.0 | -2   | -2   | -1   | 0.1 | -1   | 0.1  | 0.0 | 0.0 | -2      | 0.0   | 0.0 | -3   | -2   | -1   | -3  | -1  | -2   | -2  | 0.2 |
| Glycemic load              | gl       | 0.4 | 0.4 | 0.3 | 0.3  | 0.5  | 0.5  | 0.8 | 0.6  | 0.7  | 0.6 | 0.7 | 0.6     | 0.2   | 0.4 | 0.3  | 0.3  | 0.4  | 0.2 | 0.3 | 0.6  | 0.7 | 0.7 |

B. AREDS2 (continued)

| Nutrient                   | Variable | zinc | cu  | sel | chol | sfat | mfat | olec | pufa182 | pufa183 | epa | dpa | dha | omega | lcn3 | pufa204 | lact | alc | fib | tcholn | fcholn | gid | gl  |     |
|----------------------------|----------|------|-----|-----|------|------|------|------|---------|---------|-----|-----|-----|-------|------|---------|------|-----|-----|--------|--------|-----|-----|-----|
| Vitamin A, IU              | aiu      | 0.4  | 0.5 | 0.1 | 0.3  | 0.2  | 0.3  | 0.3  | 0.3     | 0.3     | 0.2 | 0.3 | 0.3 | 0.3   | 0.4  | 0.3     | 0.3  | 0.0 | 0.7 | 0.5    | 0.6    | -3  | 0.4 |     |
| Vitamin A, RAE             | rae      | 0.5  | 0.8 | 0.0 | 0.4  | 0.4  | 0.4  | 0.4  | 0.3     | 0.3     | 0.2 | 0.2 | 0.2 | 0.2   | 0.2  | 0.4     | 0.4  | 0.0 | 0.5 | 0.6    | 0.6    | -1  | 0.4 |     |
| Retinol, mcg               | ret      | 0.4  | 0.8 | 0.0 | 0.4  | 0.4  | 0.3  | 0.3  | 0.2     | 0.2     | 0.1 | 0.1 | 0.1 | 0.1   | 0.1  | 0.0     | 0.3  | 0.4 | 0.0 | 0.2    | 0.5    | 0.4 | 0.0 | 0.3 |
| Vitamin D, mcg             | vitd     | 0.4  | 0.3 | 0.1 | 0.3  | 0.3  | 0.3  | 0.3  | 0.2     | 0.2     | 0.4 | 0.5 | 0.6 | 0.5   | 0.7  | 0.3     | 0.6  | 0.1 | 0.4 | 0.5    | 0.5    | -2  | 0.3 |     |
| Vitamin E, mg              | vite     | 0.7  | 0.5 | 0.1 | 0.4  | 0.5  | 0.7  | 0.7  | 0.7     | 0.5     | 0.2 | 0.3 | 0.3 | 0.2   | 0.3  | 0.4     | 0.2  | 0.1 | 0.6 | 0.6    | 0.6    | -2  | 0.5 |     |
| Vitamin C, mg              | vitc     | 0.4  | 0.4 | 0.0 | 0.2  | 0.2  | 0.3  | 0.3  | 0.2     | 0.2     | 0.2 | 0.2 | 0.2 | 0.2   | 0.3  | 0.2     | 0.2  | 0.1 | 0.6 | 0.4    | 0.5    | -1  | 0.5 |     |
| Thiamine, mg               | b1       | 0.9  | 0.5 | 0.0 | 0.5  | 0.6  | 0.6  | 0.5  | 0.5     | 0.4     | 0.1 | 0.2 | 0.2 | 0.2   | 0.3  | 0.4     | 0.4  | 0.1 | 0.7 | 0.7    | 0.7    | 0.1 | 0.8 |     |
| Riboflavin, mg             | ribo     | 0.8  | 0.6 | 0.0 | 0.5  | 0.6  | 0.5  | 0.5  | 0.5     | 0.4     | 0.2 | 0.2 | 0.2 | 0.2   | 0.2  | 0.4     | 0.7  | 0.1 | 0.6 | 0.8    | 0.7    | -1  | 0.6 |     |
| Niacin, mg                 | niac     | 0.9  | 0.6 | 0.0 | 0.6  | 0.6  | 0.6  | 0.6  | 0.6     | 0.4     | 0.2 | 0.4 | 0.3 | 0.3   | 0.4  | 0.7     | 0.3  | 0.2 | 0.6 | 0.8    | 0.7    | 0.1 | 0.7 |     |
| Vitamin B6, mg             | b6       | 0.8  | 0.5 | 0.0 | 0.4  | 0.5  | 0.5  | 0.5  | 0.5     | 0.4     | 0.2 | 0.3 | 0.3 | 0.2   | 0.4  | 0.5     | 0.4  | 0.1 | 0.7 | 0.7    | 0.7    | 0.0 | 0.6 |     |
| Folate, mcg                | fol      | 0.7  | 0.5 | 0.0 | 0.3  | 0.4  | 0.5  | 0.4  | 0.4     | 0.4     | 0.2 | 0.3 | 0.3 | 0.2   | 0.3  | 0.3     | 0.3  | 0.1 | 0.7 | 0.6    | 0.7    | 0.0 | 0.7 |     |
| Natural food folate, mcg   | foodfol  | 0.5  | 0.6 | 0.1 | 0.4  | 0.4  | 0.5  | 0.5  | 0.4     | 0.4     | 0.2 | 0.3 | 0.3 | 0.3   | 0.4  | 0.4     | 0.3  | 0.2 | 0.8 | 0.7    | 0.8    | -2  | 0.6 |     |
| Folic acid, mcg            | folic    | 0.3  | 0.1 | 0.3 | 0.1  | 0.1  | 0.1  | 0.1  | 0.1     | 0.1     | 0.1 | 0.1 | 0.1 | 0.1   | 0.1  | 0.1     | 0.1  | 0.0 | 0.2 | 0.1    | 0.2    | 0.0 | 0.2 |     |
| Vitamin B12, mcg           | b12      | 0.6  | 0.8 | 0.0 | 0.5  | 0.4  | 0.4  | 0.3  | 0.3     | 0.2     | 0.2 | 0.2 | 0.2 | 0.2   | 0.3  | 0.4     | 0.4  | 0.0 | 0.3 | 0.6    | 0.4    | 0.0 | 0.4 |     |
| Beta-carotene, mcg         | bcar     | 0.3  | 0.4 | 0.1 | 0.2  | 0.1  | 0.3  | 0.3  | 0.2     | 0.3     | 0.2 | 0.3 | 0.3 | 0.3   | 0.4  | 0.3     | 0.2  | 0.0 | 0.7 | 0.4    | 0.5    | -3  | 0.3 |     |
| Alpha-carotene, mcg        | acar     | 0.3  | 0.3 | 0.0 | 0.1  | 0.1  | 0.2  | 0.2  | 0.2     | 0.2     | 0.1 | 0.2 | 0.2 | 0.2   | 0.2  | 0.2     | 0.2  | 0.0 | 0.5 | 0.4    | 0.4    | -2  | 0.3 |     |
| Beta-cryptoxanthin, mcg    | cryp     | 0.2  | 0.3 | 0.0 | 0.1  | 0.2  | 0.2  | 0.2  | 0.2     | 0.2     | 0.1 | 0.1 | 0.1 | 0.1   | 0.2  | 0.1     | 0.2  | 0.0 | 0.5 | 0.3    | 0.4    | -1  | 0.4 |     |
| Lutein and zeaxanthin, mcg | lut      | 0.2  | 0.3 | 0.1 | 0.2  | 0.1  | 0.2  | 0.2  | 0.2     | 0.2     | 0.2 | 0.3 | 0.3 | 0.3   | 0.4  | 0.2     | 0.1  | 0.1 | 0.5 | 0.3    | 0.4    | -3  | 0.2 |     |
| Lycopene, mcg              | lyc      | 0.3  | 0.3 | 0.0 | 0.2  | 0.2  | 0.3  | 0.3  | 0.2     | 0.2     | 0.1 | 0.2 | 0.1 | 0.1   | 0.2  | 0.3     | 0.1  | 0.1 | 0.3 | 0.3    | 0.4    | -1  | 0.3 |     |
| Calcium, mg                | calc     | 0.7  | 0.4 | 0.0 | 0.4  | 0.6  | 0.4  | 0.4  | 0.4     | 0.3     | 0.2 | 0.2 | 0.2 | 0.2   | 0.2  | 0.3     | 0.9  | 0.0 | 0.5 | 0.7    | 0.7    | -2  | 0.6 |     |
| Magnesium, mg              | mg       | 0.7  | 0.6 | 0.1 | 0.4  | 0.5  | 0.6  | 0.6  | 0.6     | 0.5     | 0.2 | 0.4 | 0.3 | 0.3   | 0.4  | 0.4     | 0.5  | 0.2 | 0.9 | 0.8    | 0.9    | -2  | 0.7 |     |
| Iron, mg                   | fe       | 0.8  | 0.5 | 0.0 | 0.4  | 0.5  | 0.5  | 0.5  | 0.5     | 0.4     | 0.1 | 0.2 | 0.2 | 0.2   | 0.3  | 0.4     | 0.3  | 0.1 | 0.7 | 0.6    | 0.6    | 0.2 | 0.7 |     |
| Zinc, mg                   | zinc     | 1.0  | 0.5 | 0.0 | 0.6  | 0.7  | 0.6  | 0.6  | 0.5     | 0.4     | 0.1 | 0.2 | 0.2 | 0.2   | 0.2  | 0.5     | 0.4  | 0.1 | 0.6 | 0.8    | 0.7    | 0.0 | 0.6 |     |
| Copper, mg                 | cu       | 0.5  | 1.0 | 0.0 | 0.5  | 0.5  | 0.5  | 0.5  | 0.5     | 0.4     | 0.1 | 0.2 | 0.2 | 0.2   | 0.2  | 0.4     | 0.2  | 0.1 | 0.5 | 0.6    | 0.6    | -1  | 0.5 |     |
| Selenium, mcg              | sel      | 0.0  | 0.0 | 1.0 | 0.0  | 0.0  | 0.0  | 0.0  | 0.0     | 0.0     | 0.1 | 0.1 | 0.1 | 0.1   | 0.1  | 0.0     | 0.0  | 0.0 | 0.1 | 0.0    | 0.1    | -1  | 0.0 |     |
| Cholesterol, mg            | chol     | 0.6  | 0.5 | 0.0 | 1.0  | 0.7  | 0.6  | 0.6  | 0.5     | 0.4     | 0.1 | 0.3 | 0.2 | 0.2   | 0.3  | 0.8     | 0.2  | 0.1 | 0.3 | 0.9    | 0.5    | 0.0 | 0.4 |     |
| Saturated fat, gm          | sfat     | 0.7  | 0.5 | 0.0 | 0.7  | 1.0  | 0.8  | 0.8  | 0.7     | 0.6     | 0.0 | 0.1 | 0.1 | 0.1   | 0.1  | 0.5     | 0.4  | 0.1 | 0.4 | 0.7    | 0.6    | 0.0 | 0.6 |     |
| Monounsaturated fat, gm    | mfat     | 0.6  | 0.5 | 0.0 | 0.6  | 0.8  | 1.0  | 1.0  | 0.8     | 0.6     | 0.1 | 0.2 | 0.2 | 0.2   | 0.2  | 0.5     | 0.2  | 0.2 | 0.5 | 0.7    | 0.6    | -1  | 0.5 |     |
| Oleic Acid, gm             | olec     | 0.6  | 0.5 | 0.0 | 0.6  | 0.8  | 1.0  | 1.0  | 0.8     | 0.6     | 0.1 | 0.2 | 0.2 | 0.1   | 0.2  | 0.5     | 0.2  | 0.2 | 0.5 | 0.7    | 0.6    | -1  | 0.5 |     |
| Linoleic acid, gm          | pufa182  | 0.5  | 0.5 | 0.0 | 0.5  | 0.7  | 0.8  | 0.8  | 1.0     | 0.8     | 0.1 | 0.2 | 0.1 | 0.1   | 0.2  | 0.4     | 0.2  | 0.1 | 0.5 | 0.6    | 0.5    | 0.0 | 0.5 |     |
| Alpha-linolenic acid, gm   | pufa183  | 0.4  | 0.4 | 0.0 | 0.4  | 0.6  | 0.6  | 0.6  | 0.8     | 1.0     | 0.1 | 0.2 | 0.2 | 0.2   | 0.2  | 0.3     | 0.1  | 0.1 | 0.4 | 0.5    | 0.5    | 0.0 | 0.4 |     |
| EPA, gm                    | epa      | 0.1  | 0.1 | 0.1 | 0.1  | 0.0  | 0.1  | 0.1  | 0.1     | 0.1     | 1.0 | 0.9 | 0.9 | 1.0   | 0.5  | 0.3     | 0.1  | 0.0 | 0.2 | 0.2    | 0.2    | -1  | 0.1 |     |
| DPA, gm                    | dpa      | 0.2  | 0.2 | 0.1 | 0.3  | 0.1  | 0.2  | 0.2  | 0.2     | 0.2     | 0.9 | 1.0 | 0.9 | 0.9   | 0.7  | 0.5     | 0.1  | 0.1 | 0.3 | 0.3    | 0.3    | -2  | 0.1 |     |
| DHA, gm                    | dha      | 0.2  | 0.2 | 0.1 | 0.2  | 0.1  | 0.2  | 0.2  | 0.1     | 0.2     | 0.9 | 0.9 | 1.0 | 1.0   | 0.7  | 0.4     | 0.1  | 0.1 | 0.3 | 0.3    | 0.3    | -2  | 0.1 |     |
| EPA+DHA, gm                | omega    | 0.2  | 0.2 | 0.1 | 0.2  | 0.1  | 0.2  | 0.1  | 0.1     | 0.2     | 1.0 | 0.9 | 1.0 | 1.0   | 0.6  | 0.3     | 0.1  | 0.1 | 0.2 | 0.3    | 0.2    | -1  | 0.1 |     |
| EPA+DPA+DHA, gm            | lcn3     | 0.2  | 0.2 | 0.1 | 0.3  | 0.1  | 0.2  | 0.2  | 0.2     | 0.2     | 0.5 | 0.7 | 0.7 | 0.6   | 1.0  | 0.4     | 0.1  | 0.1 | 0.4 | 0.4    | 0.4    | -2  | 0.2 |     |
| Arachidonic acid, gm       | pufa204  | 0.5  | 0.4 | 0.0 | 0.8  | 0.5  | 0.5  | 0.5  | 0.4     | 0.3     | 0.3 | 0.5 | 0.4 | 0.3   | 0.4  | 1.0     | 0.1  | 0.1 | 0.3 | 0.8    | 0.5    | -1  | 0.3 |     |
| Lactose, gm                | lact     | 0.4  | 0.2 | 0.0 | 0.2  | 0.4  | 0.2  | 0.2  | 0.2     | 0.1     | 0.1 | 0.1 | 0.1 | 0.1   | 0.1  | 0.1     | 1.0  | -1  | 0.3 | 0.5    | 0.4    | -2  | 0.4 |     |
| Alcohol, gm                | alc      | 0.1  | 0.1 | 0.0 | 0.1  | 0.1  | 0.2  | 0.2  | 0.1     | 0.1     | 0.0 | 0.1 | 0.1 | 0.1   | 0.1  | 0.1     | -1   | 1.0 | 0.0 | 0.2    | 0.4    | 0.0 | 0.0 |     |
| Fiber, gm                  | fib      | 0.6  | 0.5 | 0.1 | 0.3  | 0.4  | 0.5  | 0.5  | 0.5     | 0.4     | 0.2 | 0.3 | 0.3 | 0.2   | 0.4  | 0.3     | 0.3  | 0.0 | 1.0 | 0.6    | 0.7    | -2  | 0.7 |     |
| Total choline, mg          | tcholn   | 0.8  | 0.6 | 0.0 | 0.9  | 0.7  | 0.7  | 0.7  | 0.6     | 0.5     | 0.2 | 0.3 | 0.3 | 0.3   | 0.4  | 0.8     | 0.5  | 0.2 | 0.6 | 1.0    | 0.8    | -1  | 0.6 |     |
| Free choline, mg           | fcholn   | 0.7  | 0.6 | 0.1 | 0.5  | 0.6  | 0.6  | 0.6  | 0.5     | 0.5     | 0.2 | 0.3 | 0.3 | 0.2   | 0.4  | 0.5     | 0.4  | 0.7 | 0.8 | 1.0    | -1     | 0.7 |     |     |
| Glycemic index             | gid      | 0.0  | -1  | -1  | 0.0  | 0.0  | -1   | -1   | 0.0     | 0.0     | -1  | -2  | -2  | -1    | -2   | -1      | -2   | 0.0 | -2  | -1     | -1     | 1.0 | 0.3 |     |
| Glycemic load              | gl       | 0.6  | 0.5 | 0.0 | 0.4  | 0.6  | 0.5  | 0.5  | 0.5     | 0.4     | 0.1 | 0.1 | 0.1 | 0.1   | 0.2  | 0.3     | 0.4  | 0.0 | 0.7 | 0.6    | 0.7    | 0.3 | 1.0 |     |

Abbreviations: DHA=docosahexaenoic acid; DPA=docosapentaenoic acid; EPA=eicosapentaenoic acid; IU=international units; RAE=retinol activity equivalents
